# Supplementary material
Source: PubMed Central journal article supplement (PMC6692253)

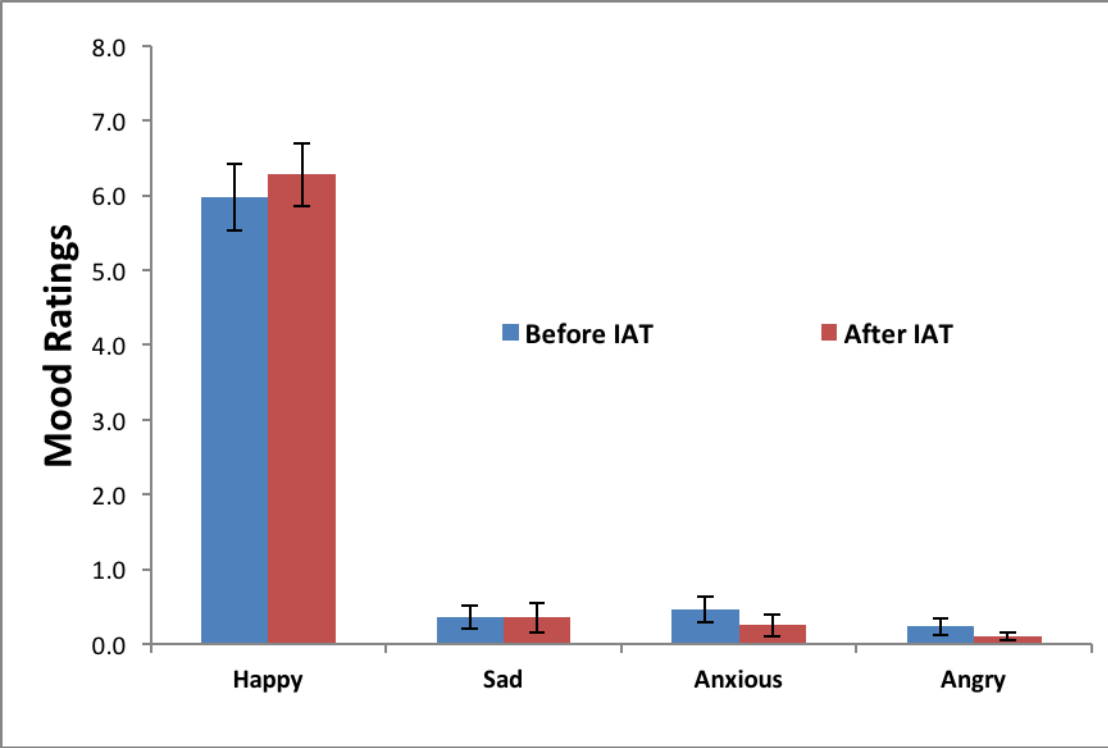

Supplement: NIHMS1007999-supplement-Supp_figS2.pdf [file NIHMS1007999-supplement-Supp_figS2.pdf]
